# Supplementary material for: Alterations in the transcript level of the Contactin Associated Protein 2 gene could conceivably influence verbal Theory of Mind and predict autism spectrum disorder incidence
Source: Research Square preprint supplement (doi:10.21203/rs.3.rs-3034106/v1), 2023-06-09
Supplement: Supplementary file 1 [file 546eccf68d67e49a85eabc72.docx]

**supplementary Table1:** Demographic Results

|  | **Gender** | | | | | **Age** | | | |
| --- | --- | --- | --- | --- | --- | --- | --- | --- | --- |
| **Group** | **Type** | **Frequency** | **Chi -squared** | **df1** | **p-value** | **Mean** | **SD2** | **W** | **p-value** |
| **ASD** | **Female** | 12 (27%) | 1.264 | 1 | 0.260 | 12.159 | 2.884 | 1070.500 | 0.391 |
| **Male** | 32 (73%) |
| **TD** | **Female** | 18 (40%) | 11.590 | 2.404 |
| **Male** | 26 (60%) |

1: Degree of freedom

2: Standard Deviation
